# Supplementary material for: Enhancing Symbiotic Nitrogen Fixation and Soybean Growth through Co-Inoculation with Bradyrhizobium and Pseudomonas Isolates
Source: MDPI journal article supplement (doi:10.3390/su132011539), 2021-10-19
Supplement: s1 [file s1]

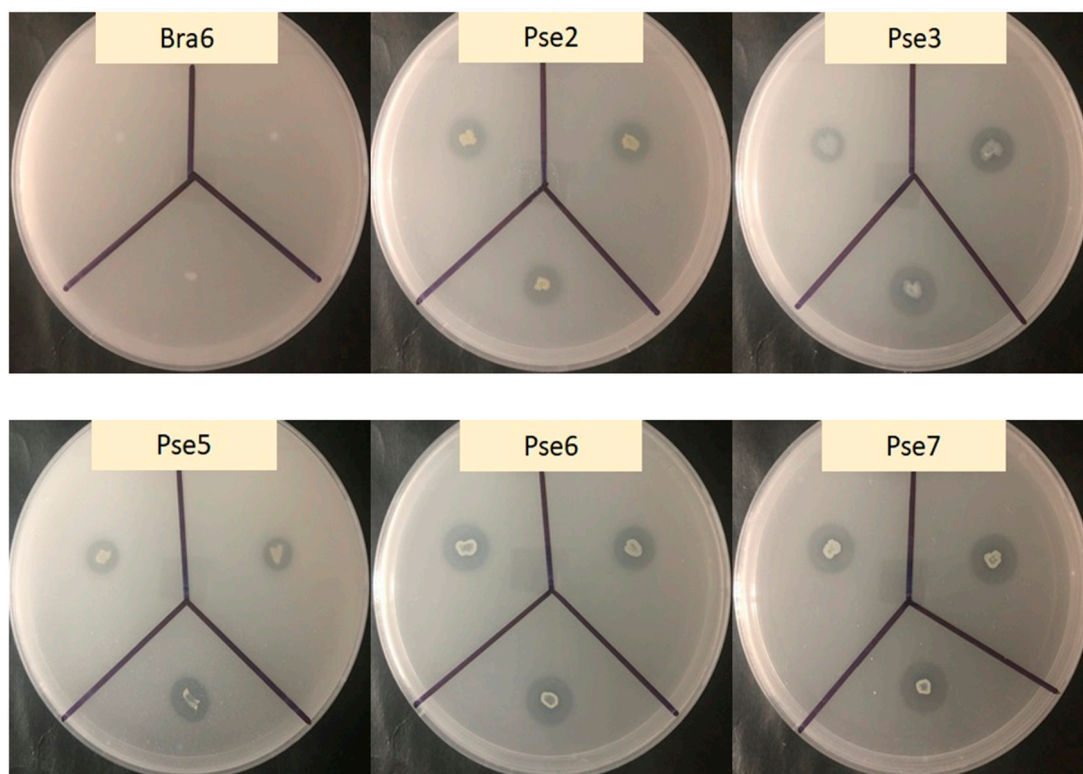

**Figure S1.** Colony morphology of the five-day bacterial cultures with/without phosphate solubilizing capability on tricalcium phosphate-containing medium. Three replications of each isolate were performed on the same plate.

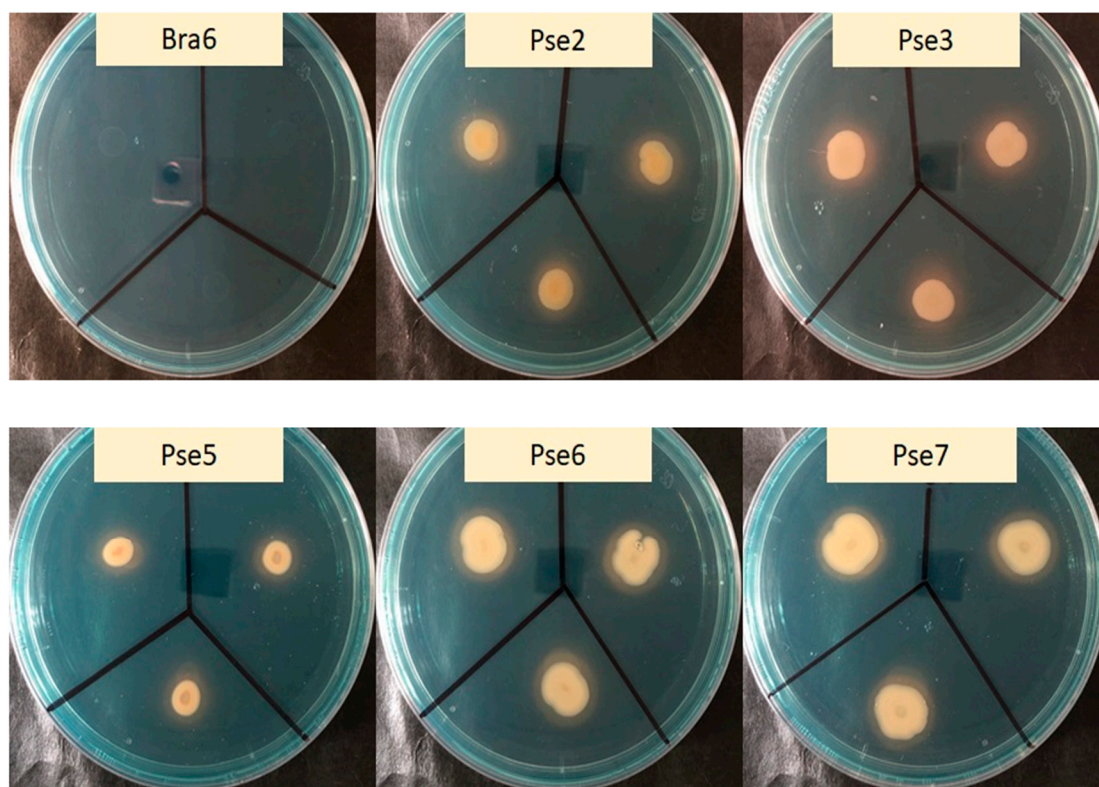

**Figure S2.** Colony morphology of the five-day bacterial cultures with/without siderophore producing capability on CAS medium. Three replications of each isolate were performed on the same plate.

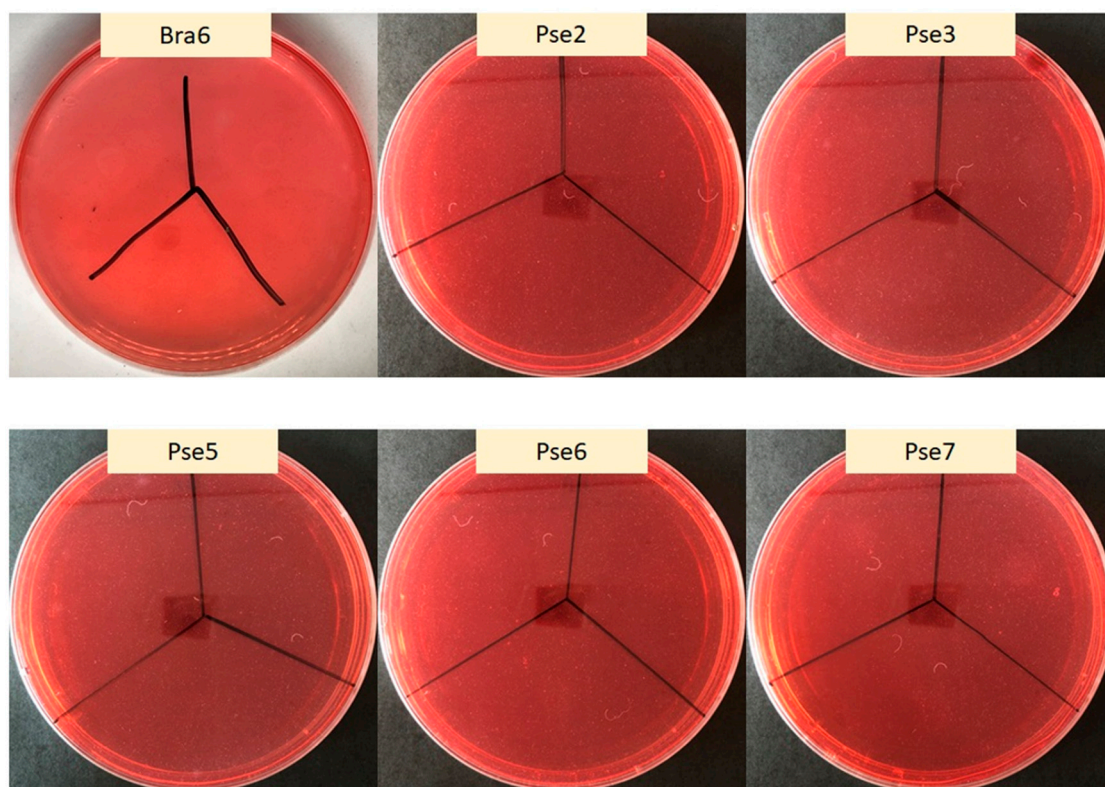

**Figure S3.** Colony morphology of the five-day bacterial cultures without cellulolytic capability on carboxymethylcellulose-containing medium. Three replications of each isolate were performed on the same plate.

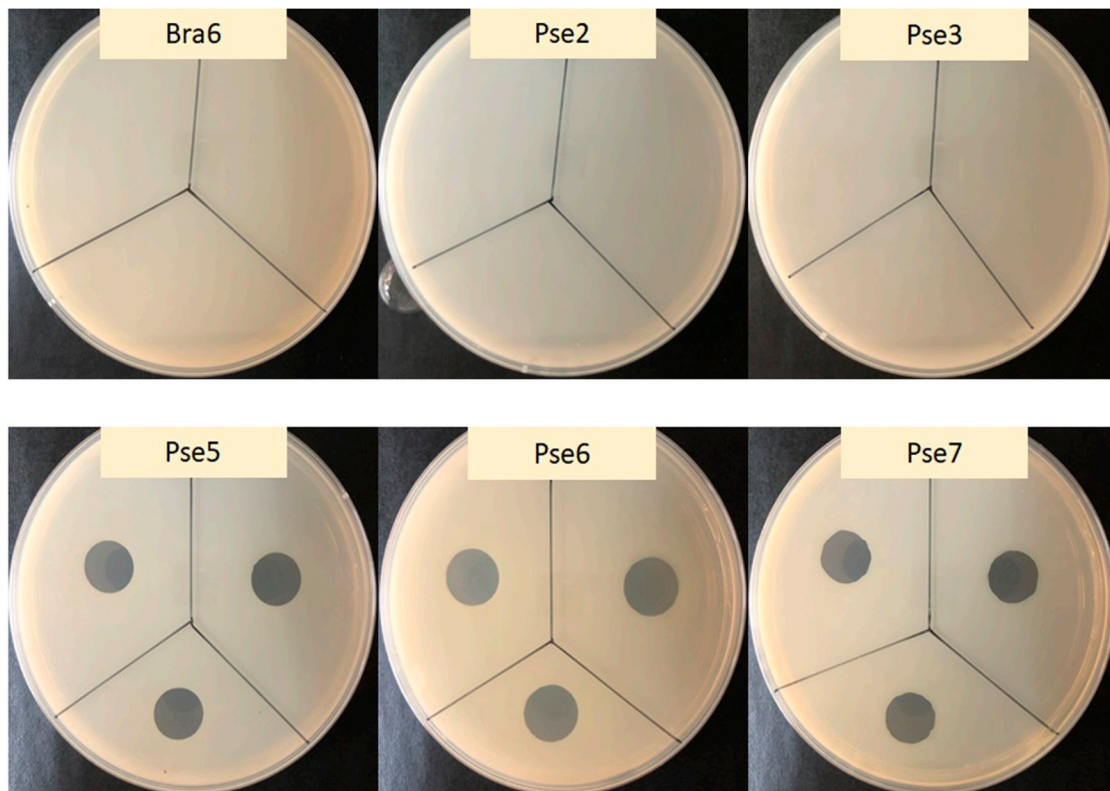

**Figure S4.** Colony morphology of the five-day bacterial cultures with/without pectinolytic capability on pectin-containing medium. Three replications of each isolate were performed on the same plate.



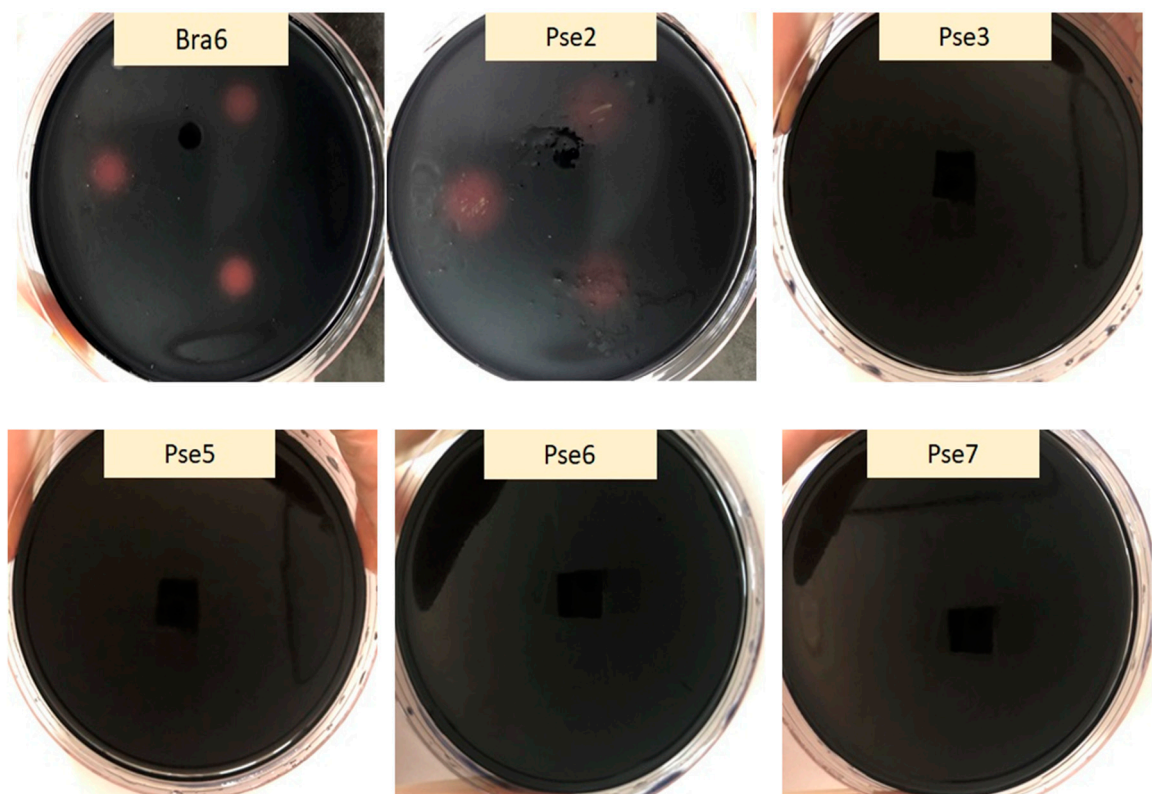

**Figure S5.** Colony morphology of the five-day bacterial cultures with/without amylolytic capability on soluble starch-containing medium. Three replications of each isolate were performed on the same plate.

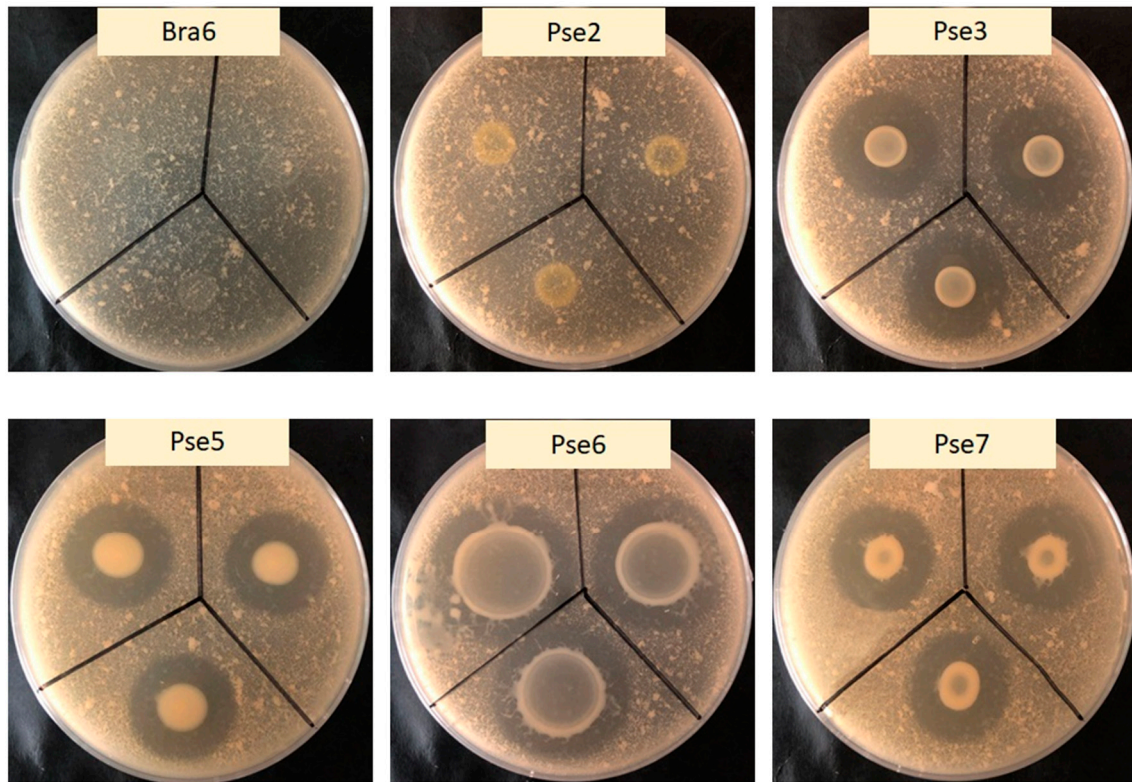

**Figure S6.** Colony morphology of the five-day bacterial cultures with/without proteolytic capability on skimmed milk-containing medium. Three replications of each isolate were performed on the same plate.
